# Supplementary material for: Synthesis, crystal structure, DFT, and photovoltaic studies of BaCeCuS3
Source: Royal Society of Chemistry journal article supplement (doi:10.1039/d2nj06301h), 2023-01-01
Supplement: d2nj06301h1.pdf [file d2nj06301h1.pdf]

## Synthesis, crystal structure, DFT, and photovoltaic studies of BaCeCuS<sub>3</sub>

Omair Shahid<sup>a</sup>, Sweta Yadav<sup>a</sup>, Debanjan Maity<sup>a</sup>, Melepurath Deepa<sup>a</sup>, Manish K. Niranjan<sup>b</sup>, and Jai Prakash<sup>a,\*</sup>

<sup>a</sup>Department of Chemistry, Indian Institute of Technology Hyderabad, Kandi, Sangareddy, Telangana 502284, India

<sup>b</sup>Department of Physics, Indian Institute of Technology Hyderabad, Kandi, Sangareddy, Telangana 502284, India

### Electronic Supplementary Information (ESI)

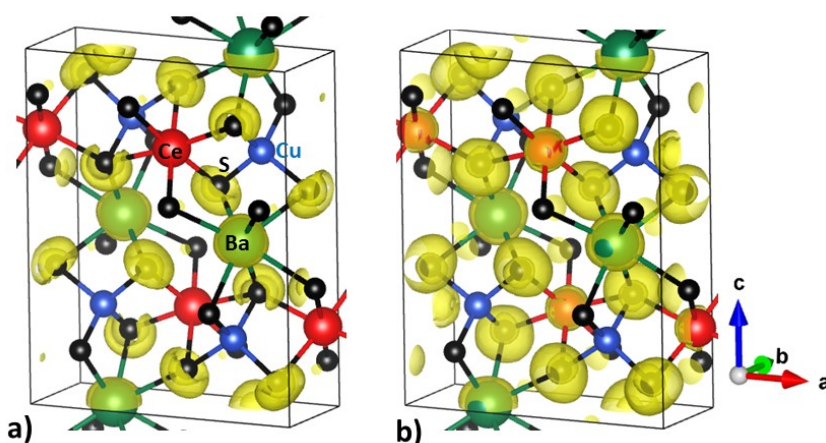

**Fig S11:** The 3D iso-surfaces of the electron localization function (ELF) for BaCeCuS<sub>3</sub> with (a)  $ELF = 0.80$  and (b)  $ELF = 0.75$ . The yellow cloud indicates the density of transferred charge.

**Table S11** Atomic displacement parameters ( $\text{\AA}^2$ ) for the BaCeCuS<sub>3</sub> structure.

|                            | U <sup>11</sup> | U <sup>22</sup> | U <sup>33</sup> | U <sup>12</sup> | U <sup>13</sup> | U <sup>23</sup> |
|----------------------------|-----------------|-----------------|-----------------|-----------------|-----------------|-----------------|
| <b>BaCeCuS<sub>3</sub></b> |                 |                 |                 |                 |                 |                 |
| Ba1                        | 0.02149(19)     | 0.01205(16)     | 0.01333(17)     | 0.000           | -0.00111(13)    | 0.000           |
| Ce1                        | 0.00723(14)     | 0.00772(14)     | 0.01306(15)     | 0.000           | 0.00010(10)     | 0.000           |
| Cu1                        | 0.0126(3)       | 0.0215(4)       | 0.0157(4)       | 0.000           | 0.0008(3)       | 0.000           |
| S1                         | 0.0111(6)       | 0.0101(5)       | 0.0108(6)       | 0.000           | 0.0009(5)       | 0.000           |
| S2                         | 0.0084(5)       | 0.0096(5)       | 0.0115(6)       | 0.000           | -0.0004(4)      | 0.000           |
| S3                         | 0.0133(6)       | 0.0108(5)       | 0.0110(6)       | 0.000           | -0.0003(5)      | 0.000           |

**Table S12** All the bond angles (in degrees) in BaCeCuS<sub>3</sub>

|                                          |              |                                            |             |
|------------------------------------------|--------------|--------------------------------------------|-------------|
| S2 <sup>i</sup> —Ba1—S2 <sup>ii</sup>    | 81.54 (4)    | S3 <sup>viii</sup> —Ce1—Ce1 <sup>v</sup>   | 43.37 (2)   |
| S2 <sup>i</sup> —Ba1—S3 <sup>ii</sup>    | 134.76 (3)   | S1 <sup>ix</sup> —Ce1—Ce1 <sup>v</sup>     | 44.13 (2)   |
| S2 <sup>ii</sup> —Ba1—S3 <sup>ii</sup>   | 82.70 (3)    | S1 <sup>x</sup> —Ce1—Ce1 <sup>v</sup>      | 135.87 (2)  |
| S2 <sup>i</sup> —Ba1—S3 <sup>i</sup>     | 82.70 (3)    | Cu1 <sup>vii</sup> —Ce1—Ce1 <sup>v</sup>   | 127.412 (9) |
| S2 <sup>ii</sup> —Ba1—S3 <sup>i</sup>    | 134.76 (3)   | Cu1 <sup>viii</sup> —Ce1—Ce1 <sup>v</sup>  | 52.589 (9)  |
| S3 <sup>ii</sup> —Ba1—S3 <sup>i</sup>    | 79.07 (3)    | Cu1 <sup>ix</sup> —Ce1—Ce1 <sup>v</sup>    | 52.883 (9)  |
| S2 <sup>i</sup> —Ba1—S1 <sup>i</sup>     | 92.20 (3)    | Cu1 <sup>x</sup> —Ce1—Ce1 <sup>v</sup>     | 127.116 (9) |
| S2 <sup>ii</sup> —Ba1—S1 <sup>i</sup>    | 150.38 (3)   | S2 <sup>vi</sup> —Ce1—Ce1 <sup>iv</sup>    | 90.0        |
| S3 <sup>ii</sup> —Ba1—S1 <sup>i</sup>    | 120.17 (3)   | S2—Ce1—Ce1 <sup>iv</sup>                   | 90.0        |
| S3 <sup>i</sup> —Ba1—S1 <sup>i</sup>     | 72.09 (3)    | S3 <sup>vii</sup> —Ce1—Ce1 <sup>iv</sup>   | 43.37 (2)   |
| S2 <sup>i</sup> —Ba1—S1 <sup>ii</sup>    | 150.38 (3)   | S3 <sup>viii</sup> —Ce1—Ce1 <sup>iv</sup>  | 136.63 (2)  |
| S2 <sup>ii</sup> —Ba1—S1 <sup>ii</sup>   | 92.20 (3)    | S1 <sup>ix</sup> —Ce1—Ce1 <sup>iv</sup>    | 135.87 (2)  |
| S3 <sup>ii</sup> —Ba1—S1 <sup>ii</sup>   | 72.09 (3)    | S1 <sup>x</sup> —Ce1—Ce1 <sup>iv</sup>     | 44.13 (2)   |
| S3 <sup>i</sup> —Ba1—S1 <sup>ii</sup>    | 120.17 (3)   | Cu1 <sup>vii</sup> —Ce1—Ce1 <sup>iv</sup>  | 52.589 (9)  |
| S1 <sup>i</sup> —Ba1—S1 <sup>ii</sup>    | 79.03 (3)    | Cu1 <sup>viii</sup> —Ce1—Ce1 <sup>iv</sup> | 127.412 (9) |
| S2 <sup>i</sup> —Ba1—S1 <sup>iii</sup>   | 75.41 (3)    | Cu1 <sup>ix</sup> —Ce1—Ce1 <sup>iv</sup>   | 127.116 (9) |
| S2 <sup>ii</sup> —Ba1—S1 <sup>iii</sup>  | 75.41 (3)    | Cu1 <sup>x</sup> —Ce1—Ce1 <sup>iv</sup>    | 52.883 (9)  |
| S3 <sup>ii</sup> —Ba1—S1 <sup>iii</sup>  | 139.386 (18) | Ce1 <sup>v</sup> —Ce1—Ce1 <sup>iv</sup>    | 180.0       |
| S3 <sup>i</sup> —Ba1—S1 <sup>iii</sup>   | 139.386 (18) | S1—Cu1—S3                                  | 108.10 (6)  |
| S1 <sup>i</sup> —Ba1—S1 <sup>iii</sup>   | 74.99 (3)    | S1—Cu1—S2 <sup>ii</sup>                    | 108.60 (4)  |
| S1 <sup>ii</sup> —Ba1—S1 <sup>iii</sup>  | 74.99 (3)    | S3—Cu1—S2 <sup>ii</sup>                    | 108.88 (4)  |
| S2 <sup>i</sup> —Ba1—Cu1 <sup>ii</sup>   | 169.52 (3)   | S1—Cu1—S2 <sup>i</sup>                     | 108.60 (4)  |
| S2 <sup>ii</sup> —Ba1—Cu1 <sup>ii</sup>  | 104.08 (2)   | S3—Cu1—S2 <sup>i</sup>                     | 108.88 (4)  |
| S3 <sup>ii</sup> —Ba1—Cu1 <sup>ii</sup>  | 39.54 (3)    | S2 <sup>ii</sup> —Cu1—S2 <sup>i</sup>      | 113.63 (6)  |
| S3 <sup>i</sup> —Ba1—Cu1 <sup>ii</sup>   | 87.14 (2)    | S1—Cu1—Ce1 <sup>i</sup>                    | 134.96 (2)  |
| S1 <sup>i</sup> —Ba1—Cu1 <sup>ii</sup>   | 87.08 (2)    | S3—Cu1—Ce1 <sup>i</sup>                    | 55.64 (3)   |
| S1 <sup>ii</sup> —Ba1—Cu1 <sup>ii</sup>  | 39.47 (3)    | S2 <sup>ii</sup> —Cu1—Ce1 <sup>i</sup>     | 116.38 (4)  |
| S1 <sup>iii</sup> —Ba1—Cu1 <sup>ii</sup> | 114.38 (2)   | S2 <sup>i</sup> —Cu1—Ce1 <sup>i</sup>      | 55.07 (3)   |
| S2 <sup>i</sup> —Ba1—Cu1 <sup>i</sup>    | 104.08 (2)   | S1—Cu1—Ce1 <sup>ii</sup>                   | 134.96 (2)  |

|                                          |              |                                           |              |
|------------------------------------------|--------------|-------------------------------------------|--------------|
| S2 <sup>ii</sup> —Ba1—Cu1 <sup>i</sup>   | 169.52 (3)   | S3—Cu1—Ce1 <sup>ii</sup>                  | 55.64 (3)    |
| S3 <sup>ii</sup> —Ba1—Cu1 <sup>i</sup>   | 87.14 (2)    | S2 <sup>ii</sup> —Cu1—Ce1 <sup>ii</sup>   | 55.07 (3)    |
| S3 <sup>i</sup> —Ba1—Cu1 <sup>i</sup>    | 39.54 (3)    | S2 <sup>i</sup> —Cu1—Ce1 <sup>ii</sup>    | 116.38 (4)   |
| S1 <sup>i</sup> —Ba1—Cu1 <sup>i</sup>    | 39.47 (3)    | Ce1 <sup>i</sup> —Cu1—Ce1 <sup>ii</sup>   | 74.822 (19)  |
| S1 <sup>ii</sup> —Ba1—Cu1 <sup>i</sup>   | 87.08 (2)    | S1—Cu1—Ce1 <sup>ix</sup>                  | 56.13 (3)    |
| S1 <sup>iii</sup> —Ba1—Cu1 <sup>i</sup>  | 114.38 (2)   | S3—Cu1—Ce1 <sup>ix</sup>                  | 135.67 (2)   |
| Cu1 <sup>ii</sup> —Ba1—Cu1 <sup>i</sup>  | 69.030 (19)  | S2 <sup>ii</sup> —Cu1—Ce1 <sup>ix</sup>   | 54.49 (3)    |
| S2 <sup>i</sup> —Ba1—Cu1                 | 40.810 (19)  | S2 <sup>i</sup> —Cu1—Ce1 <sup>ix</sup>    | 115.41 (4)   |
| S2 <sup>ii</sup> —Ba1—Cu1                | 40.810 (19)  | Ce1 <sup>i</sup> —Cu1—Ce1 <sup>ix</sup>   | 165.31 (3)   |
| S3 <sup>ii</sup> —Ba1—Cu1                | 113.88 (3)   | Ce1 <sup>ii</sup> —Cu1—Ce1 <sup>ix</sup>  | 103.537 (11) |
| S3 <sup>i</sup> —Ba1—Cu1                 | 113.88 (3)   | S1—Cu1—Ce1 <sup>x</sup>                   | 56.13 (3)    |
| S1 <sup>i</sup> —Ba1—Cu1                 | 125.55 (2)   | S3—Cu1—Ce1 <sup>x</sup>                   | 135.67 (2)   |
| S1 <sup>ii</sup> —Ba1—Cu1                | 125.55 (2)   | S2 <sup>ii</sup> —Cu1—Ce1 <sup>x</sup>    | 115.41 (4)   |
| S1 <sup>iii</sup> —Ba1—Cu1               | 68.52 (3)    | S2 <sup>i</sup> —Cu1—Ce1 <sup>x</sup>     | 54.49 (3)    |
| Cu1 <sup>ii</sup> —Ba1—Cu1               | 144.563 (10) | Ce1 <sup>i</sup> —Cu1—Ce1 <sup>x</sup>    | 103.537 (11) |
| Cu1 <sup>i</sup> —Ba1—Cu1                | 144.563 (10) | Ce1 <sup>ii</sup> —Cu1—Ce1 <sup>x</sup>   | 165.31 (3)   |
| S2 <sup>i</sup> —Ba1—Ba1 <sup>iv</sup>   | 49.233 (18)  | Ce1 <sup>ix</sup> —Cu1—Ce1 <sup>x</sup>   | 74.234 (18)  |
| S2 <sup>ii</sup> —Ba1—Ba1 <sup>iv</sup>  | 130.768 (18) | S1—Cu1—Ba1 <sup>vii</sup>                 | 61.09 (3)    |
| S3 <sup>ii</sup> —Ba1—Ba1 <sup>iv</sup>  | 129.534 (17) | S3—Cu1—Ba1 <sup>vii</sup>                 | 61.05 (3)    |
| S3 <sup>i</sup> —Ba1—Ba1 <sup>iv</sup>   | 50.467 (17)  | S2 <sup>ii</sup> —Cu1—Ba1 <sup>vii</sup>  | 157.70 (4)   |
| S1 <sup>i</sup> —Ba1—Ba1 <sup>iv</sup>   | 50.484 (16)  | S2 <sup>i</sup> —Cu1—Ba1 <sup>vii</sup>   | 88.67 (3)    |
| S1 <sup>ii</sup> —Ba1—Ba1 <sup>iv</sup>  | 129.514 (16) | Ce1 <sup>i</sup> —Cu1—Ba1 <sup>vii</sup>  | 75.832 (13)  |
| S1 <sup>iii</sup> —Ba1—Ba1 <sup>iv</sup> | 90.0         | Ce1 <sup>ii</sup> —Cu1—Ba1 <sup>vii</sup> | 116.34 (2)   |
| Cu1 <sup>ii</sup> —Ba1—Ba1 <sup>iv</sup> | 124.514 (10) | Ce1 <sup>ix</sup> —Cu1—Ba1 <sup>vii</sup> | 116.95 (2)   |
| Cu1 <sup>i</sup> —Ba1—Ba1 <sup>iv</sup>  | 55.485 (10)  | Ce1 <sup>x</sup> —Cu1—Ba1 <sup>vii</sup>  | 76.661 (13)  |
| Cu1—Ba1—Ba1 <sup>iv</sup>                | 90.0         | S1—Cu1—Ba1 <sup>viii</sup>                | 61.09 (3)    |
| S2 <sup>i</sup> —Ba1—Ba1 <sup>v</sup>    | 130.768 (18) | S3—Cu1—Ba1 <sup>viii</sup>                | 61.05 (3)    |
| S2 <sup>ii</sup> —Ba1—Ba1 <sup>v</sup>   | 49.233 (18)  | S2 <sup>ii</sup> —Cu1—Ba1 <sup>viii</sup> | 88.67 (3)    |
| S3 <sup>ii</sup> —Ba1—Ba1 <sup>v</sup>   | 50.467 (17)  | S2 <sup>i</sup> —Cu1—Ba1 <sup>viii</sup>  | 157.70 (4)   |
| S3 <sup>i</sup> —Ba1—Ba1 <sup>v</sup>    | 129.534 (17) | Ce1 <sup>i</sup> —Cu1—Ba1 <sup>viii</sup> | 116.34 (2)   |

|                                            |              |                                             |              |
|--------------------------------------------|--------------|---------------------------------------------|--------------|
| S1 <sup>i</sup> —Ba1—Ba1 <sup>v</sup>      | 129.514 (16) | Ce1 <sup>ii</sup> —Cu1—Ba1 <sup>viii</sup>  | 75.832 (13)  |
| S1 <sup>ii</sup> —Ba1—Ba1 <sup>v</sup>     | 50.484 (16)  | Ce1 <sup>ix</sup> —Cu1—Ba1 <sup>viii</sup>  | 76.661 (13)  |
| S1 <sup>iii</sup> —Ba1—Ba1 <sup>v</sup>    | 90.0         | Ce1 <sup>x</sup> —Cu1—Ba1 <sup>viii</sup>   | 116.95 (2)   |
| Cu1 <sup>ii</sup> —Ba1—Ba1 <sup>v</sup>    | 55.485 (10)  | Ba1 <sup>vii</sup> —Cu1—Ba1 <sup>viii</sup> | 69.030 (19)  |
| Cu1 <sup>i</sup> —Ba1—Ba1 <sup>v</sup>     | 124.514 (10) | S1—Cu1—Ba1                                  | 129.30 (4)   |
| Cu1—Ba1—Ba1 <sup>v</sup>                   | 90.0         | S3—Cu1—Ba1                                  | 122.60 (4)   |
| Ba1 <sup>iv</sup> —Ba1—Ba1 <sup>v</sup>    | 180.0        | S2 <sup>ii</sup> —Cu1—Ba1                   | 56.89 (3)    |
| S2 <sup>vi</sup> —Ce1—S2                   | 173.75 (2)   | S2 <sup>i</sup> —Cu1—Ba1                    | 56.89 (3)    |
| S2 <sup>vi</sup> —Ce1—S3 <sup>vii</sup>    | 96.69 (4)    | Ce1 <sup>i</sup> —Cu1—Ba1                   | 80.399 (16)  |
| S2—Ce1—S3 <sup>vii</sup>                   | 87.59 (4)    | Ce1 <sup>ii</sup> —Cu1—Ba1                  | 80.399 (16)  |
| S2 <sup>vi</sup> —Ce1—S3 <sup>viii</sup>   | 96.69 (4)    | Ce1 <sup>ix</sup> —Cu1—Ba1                  | 84.927 (17)  |
| S2—Ce1—S3 <sup>viii</sup>                  | 87.59 (3)    | Ce1 <sup>x</sup> —Cu1—Ba1                   | 84.927 (17)  |
| S3 <sup>vii</sup> —Ce1—S3 <sup>viii</sup>  | 93.27 (4)    | Ba1 <sup>vii</sup> —Cu1—Ba1                 | 145.341 (10) |
| S2 <sup>vi</sup> —Ce1—S1 <sup>ix</sup>     | 86.79 (3)    | Ba1 <sup>viii</sup> —Cu1—Ba1                | 145.341 (10) |
| S2—Ce1—S1 <sup>ix</sup>                    | 88.87 (3)    | Cu1—S1—Ce1 <sup>ix</sup>                    | 81.01 (4)    |
| S3 <sup>vii</sup> —Ce1—S1 <sup>ix</sup>    | 176.36 (4)   | Cu1—S1—Ce1 <sup>x</sup>                     | 81.01 (4)    |
| S3 <sup>viii</sup> —Ce1—S1 <sup>ix</sup>   | 87.38 (3)    | Ce1 <sup>ix</sup> —S1—Ce1 <sup>x</sup>      | 91.75 (4)    |
| S2 <sup>vi</sup> —Ce1—S1 <sup>x</sup>      | 86.79 (3)    | Cu1—S1—Ba1 <sup>vii</sup>                   | 79.43 (4)    |
| S2—Ce1—S1 <sup>x</sup>                     | 88.87 (3)    | Ce1 <sup>ix</sup> —S1—Ba1 <sup>vii</sup>    | 159.46 (5)   |
| S3 <sup>vii</sup> —Ce1—S1 <sup>x</sup>     | 87.38 (3)    | Ce1 <sup>x</sup> —S1—Ba1 <sup>vii</sup>     | 91.316 (15)  |
| S3 <sup>viii</sup> —Ce1—S1 <sup>x</sup>    | 176.36 (4)   | Cu1—S1—Ba1 <sup>viii</sup>                  | 79.43 (4)    |
| S1 <sup>ix</sup> —Ce1—S1 <sup>x</sup>      | 91.75 (4)    | Ce1 <sup>ix</sup> —S1—Ba1 <sup>viii</sup>   | 91.316 (15)  |
| S2 <sup>vi</sup> —Ce1—Cu1 <sup>vii</sup>   | 137.492 (18) | Ce1 <sup>x</sup> —S1—Ba1 <sup>viii</sup>    | 159.46 (5)   |
| S2—Ce1—Cu1 <sup>vii</sup>                  | 45.524 (19)  | Ba1 <sup>vii</sup> —S1—Ba1 <sup>viii</sup>  | 79.03 (3)    |
| S3 <sup>vii</sup> —Ce1—Cu1 <sup>vii</sup>  | 43.31 (3)    | Cu1—S1—Ba1 <sup>xi</sup>                    | 174.14 (6)   |
| S3 <sup>viii</sup> —Ce1—Cu1 <sup>vii</sup> | 98.96 (3)    | Ce1 <sup>ix</sup> —S1—Ba1 <sup>xi</sup>     | 94.95 (3)    |
| S1 <sup>ix</sup> —Ce1—Cu1 <sup>vii</sup>   | 133.05 (3)   | Ce1 <sup>x</sup> —S1—Ba1 <sup>xi</sup>      | 94.95 (3)    |
| S1 <sup>x</sup> —Ce1—Cu1 <sup>vii</sup>    | 79.08 (3)    | Ba1 <sup>vii</sup> —S1—Ba1 <sup>xi</sup>    | 105.00 (3)   |
| S2 <sup>vi</sup> —Ce1—Cu1 <sup>viii</sup>  | 137.492 (18) | Ba1 <sup>viii</sup> —S1—Ba1 <sup>xi</sup>   | 105.00 (3)   |
| S2—Ce1—Cu1 <sup>viii</sup>                 | 45.524 (19)  | Cu1 <sup>vii</sup> —S2—Cu1 <sup>viii</sup>  | 113.63 (6)   |

|                                             |              |                                             |             |
|---------------------------------------------|--------------|---------------------------------------------|-------------|
| S3 <sup>vii</sup> —Ce1—Cu1 <sup>viii</sup>  | 98.96 (3)    | Cu1 <sup>vii</sup> —S2—Ce1 <sup>xii</sup>   | 80.23 (4)   |
| S3 <sup>viii</sup> —Ce1—Cu1 <sup>viii</sup> | 43.31 (3)    | Cu1 <sup>viii</sup> —S2—Ce1 <sup>xii</sup>  | 80.23 (4)   |
| S1 <sup>ix</sup> —Ce1—Cu1 <sup>viii</sup>   | 79.08 (3)    | Cu1 <sup>vii</sup> —S2—Ce1                  | 79.40 (4)   |
| S1 <sup>x</sup> —Ce1—Cu1 <sup>viii</sup>    | 133.05 (3)   | Cu1 <sup>viii</sup> —S2—Ce1                 | 79.40 (4)   |
| Cu1 <sup>vii</sup> —Ce1—Cu1 <sup>viii</sup> | 74.822 (18)  | Ce1 <sup>xii</sup> —S2—Ce1                  | 142.31 (5)  |
| S2 <sup>vi</sup> —Ce1—Cu1 <sup>ix</sup>     | 45.282 (19)  | Cu1 <sup>vii</sup> —S2—Ba1 <sup>viii</sup>  | 163.53 (5)  |
| S2—Ce1—Cu1 <sup>ix</sup>                    | 131.19 (2)   | Cu1 <sup>viii</sup> —S2—Ba1 <sup>viii</sup> | 82.30 (2)   |
| S3 <sup>vii</sup> —Ce1—Cu1 <sup>ix</sup>    | 140.76 (3)   | Ce1 <sup>xii</sup> —S2—Ba1 <sup>viii</sup>  | 107.77 (3)  |
| S3 <sup>viii</sup> —Ce1—Cu1 <sup>ix</sup>   | 84.10 (3)    | Ce1—S2—Ba1 <sup>viii</sup>                  | 100.51 (3)  |
| S1 <sup>ix</sup> —Ce1—Cu1 <sup>ix</sup>     | 42.86 (3)    | Cu1 <sup>vii</sup> —S2—Ba1 <sup>vii</sup>   | 82.30 (2)   |
| S1 <sup>x</sup> —Ce1—Cu1 <sup>ix</sup>      | 97.66 (3)    | Cu1 <sup>viii</sup> —S2—Ba1 <sup>vii</sup>  | 163.53 (5)  |
| Cu1 <sup>vii</sup> —Ce1—Cu1 <sup>ix</sup>   | 175.051 (11) | Ce1 <sup>xii</sup> —S2—Ba1 <sup>vii</sup>   | 107.77 (3)  |
| Cu1 <sup>viii</sup> —Ce1—Cu1 <sup>ix</sup>  | 105.251 (11) | Ce1—S2—Ba1 <sup>vii</sup>                   | 100.51 (3)  |
| S2 <sup>vi</sup> —Ce1—Cu1 <sup>x</sup>      | 45.282 (19)  | Ba1 <sup>viii</sup> —S2—Ba1 <sup>vii</sup>  | 81.53 (4)   |
| S2—Ce1—Cu1 <sup>x</sup>                     | 131.19 (2)   | Cu1—S3—Ce1 <sup>ii</sup>                    | 81.05 (4)   |
| S3 <sup>vii</sup> —Ce1—Cu1 <sup>x</sup>     | 84.10 (3)    | Cu1—S3—Ce1 <sup>i</sup>                     | 81.05 (4)   |
| S3 <sup>viii</sup> —Ce1—Cu1 <sup>x</sup>    | 140.76 (3)   | Ce1 <sup>ii</sup> —S3—Ce1 <sup>i</sup>      | 93.27 (4)   |
| S1 <sup>ix</sup> —Ce1—Cu1 <sup>x</sup>      | 97.66 (3)    | Cu1—S3—Ba1 <sup>viii</sup>                  | 79.41 (4)   |
| S1 <sup>x</sup> —Ce1—Cu1 <sup>x</sup>       | 42.86 (3)    | Ce1 <sup>ii</sup> —S3—Ba1 <sup>viii</sup>   | 90.552 (15) |
| Cu1 <sup>vii</sup> —Ce1—Cu1 <sup>x</sup>    | 105.251 (11) | Ce1 <sup>i</sup> —S3—Ba1 <sup>viii</sup>    | 159.25 (5)  |
| Cu1 <sup>viii</sup> —Ce1—Cu1 <sup>x</sup>   | 175.051 (11) | Cu1—S3—Ba1 <sup>vii</sup>                   | 79.41 (4)   |
| Cu1 <sup>ix</sup> —Ce1—Cu1 <sup>x</sup>     | 74.234 (18)  | Ce1 <sup>ii</sup> —S3—Ba1 <sup>vii</sup>    | 159.25 (5)  |
| S2 <sup>vi</sup> —Ce1—Ce1 <sup>v</sup>      | 90.0         | Ce1 <sup>i</sup> —S3—Ba1 <sup>vii</sup>     | 90.552 (15) |
| S2—Ce1—Ce1 <sup>v</sup>                     | 90.0         | Ba1 <sup>viii</sup> —S3—Ba1 <sup>vii</sup>  | 79.07 (3)   |
| S3 <sup>vii</sup> —Ce1—Ce1 <sup>v</sup>     | 136.63 (2)   |                                             |             |

Symmetry codes: (i)  $-x+1/2, y+1/2, z-1/2$ ; (ii)  $-x+1/2, y-1/2, z-1/2$ ; (iii)  $x+1/2, -y+1/2, -z+1/2$ ; (iv)  $x, y+1, z$ ; (v)  $x, y-1, z$ ; (vi)  $x-1/2, -y+1/2, -z+3/2$ ; (vii)  $-x+1/2, y+1/2, z+1/2$ ; (viii)  $-x+1/2, y-1/2, z+1/2$ ; (ix)  $-x, -y, -z+1$ ; (x)  $-x, -y+1, -z+1$ ; (xi)  $x-1/2, -y+1/2, -z+1/2$ ; (xii)  $x+1/2, -y+1/2, -z+3/2$ .

## Section SI1: Optical Properties

The optical parameters are computed from the complex dielectric function  $\varepsilon(\omega) = \varepsilon'(\omega) + i\varepsilon''(\omega)$ . The imaginary part of the dielectric function  $\varepsilon''(\omega)$  is given in terms of electronic band structure as

$$\varepsilon''_{ij}(\omega) = \frac{4\pi^2 e^2}{V} \lim_{q \rightarrow 0} \sum_{c,v,\vec{k}} 2w_{\vec{k}} \delta(\varepsilon_{c\vec{k}} - \varepsilon_{v\vec{k}} - \omega) \times \langle u_{c\vec{k} + \hat{e}_i q} | u_{v\vec{k}} \rangle \langle u_{c\vec{k} + \hat{e}_j q} | u_{v\vec{k}} \rangle^* \quad (\text{S1-1})$$

where index  $v$  indicates the valence band (VB),  $c$  indicates the conduction band (CB) states;  $V$  is the volume of the unit cell;  $\varepsilon_{c\vec{k}}$  and  $\varepsilon_{v\vec{k}}$  are CB and VB single-electron energy at  $\vec{k}$ ;  $u_{c\vec{k}}$  is the cell periodic part of the orbitals at the wave vector  $\vec{k}$ ;  $w_{\vec{k}}$  is the weight of the k-points,  $\hat{e}_i$  and  $\hat{e}_j$  are the unit vectors for the three Cartesian directions.

The Kramers-Kronig transformation is used to obtain the real part of the dielectric function  $\varepsilon'(\omega)$  from  $\varepsilon''(\omega)$ :

$$\varepsilon'_{ij}(\omega) = 1 + \frac{2}{\pi} P \int_0^{\infty} \frac{\varepsilon''_{ij}(\omega') \omega'}{\omega'^2 - \omega^2 + i\eta} d\omega' \quad (\text{S1-2})$$

Where  $P$  is the principal value and  $\eta$  is a small complex shift. The absorption coefficient  $\alpha(\omega)$  can be expressed in terms of  $\varepsilon'(\omega)$  and  $\varepsilon''(\omega)$  as:

$$\alpha(\omega) = \frac{\sqrt{2}\omega}{c} [\sqrt{\varepsilon'(\omega)^2 + \varepsilon''(\omega)^2} - \varepsilon'(\omega)]^{1/2} \quad (\text{S1-3})$$

## Section SI2: Thermoelectric properties

The thermoelectric parameters can be computed using the electronic band structure and semi-classical Boltzmann transport theory within the rigid band approach.

The shift in the chemical potential can be used to simulate the carrier concentration ( $p$ - or  $n$ -type) in the system. The electrical conductivity ( $\sigma_{ij}$ ) can be expressed in terms of chemical potential ( $\mu$ ) and temperature ( $T$ ) as:

$$\sigma_{ij}(T;\mu) = \frac{1}{V} \int \sigma_{ij}(\epsilon) \left[ -\frac{\partial f_{\mu}(T;\mu)}{\partial \epsilon} \right] d\epsilon \quad (\text{S2-1})$$

where  $f_{\mu}(T;\mu)$  is the Fermi function,  $V$  is the volume,  $\epsilon$  is the energy. Further, the  $\sigma_{ij}$  as function of energy ( $\epsilon$ ) can be expressed as:

$$\sigma_{ij}(\epsilon) = \frac{1}{N} \sum_{n, \vec{k}} \sigma_{ij}(n, \vec{k}) \delta(\epsilon - \epsilon_{n, \vec{k}}) \quad (\text{S2-2})$$

Where  $N$  is the number of  $\vec{k}$  points in the Brillouin zone and  $\epsilon_{n, \vec{k}}$  are the band energies.  $\sigma_{ij}(n, \vec{k})$  can be obtained using relaxation time  $\tau_{n, \vec{k}}$  and group velocity  $\vec{v}(n, \vec{k})$  as:

$$\sigma_{ij}(n, \vec{k}) = e^2 \tau_{n, \vec{k}} v_i(n, \vec{k}) v_j(n, \vec{k}) \quad (\text{S2-3})$$

The Seebeck coefficient tensor ( $S_{ij}$ ) as a function of temperature ( $T$ ) and chemical potential ( $\mu$ ) can be expressed as:

$$S_{ij}(T; \mu) = \frac{1}{eTV\sigma_{ij}(T; \mu)} \int \sigma_{ij}(\epsilon) (\epsilon - \mu) \left[ -\frac{\partial f_{\mu}(T; \mu)}{\partial \epsilon} \right] d\epsilon \quad (\text{S2-4})$$

The figure of merit ( $zT$ ) is given as  $zT = \frac{S^2 \sigma T}{(k_{el} + k_{lat})}$ . Here, the  $k_{el}$  is the electronic component and  $k_l$  is the lattice (phonon) component of thermal conductivity. The  $k_{el}$  is related to electrical

conductivity ( $\sigma$ ) as  $k_{el} = L_0 \sigma T$  (Wiedemann-Franz relation), where  $L_0 = \frac{\pi^2}{3} \left( \frac{k_B}{e} \right)^2$  is the Lorentz number. The quantities  $\sigma$  and  $k_{el}$  are computed with respect to the relaxation time  $\tau = (T_0 \times n_0^{1/3}) / (T n^{1/3}) \times 10^{-14} \text{ s}$  where  $n_0$  is the carrier concentration at  $T_0 = 300 \text{ K}$ .
